# Supplementary material for: Neutrophil elastase-cleaved corticosteroid-binding globulin is absent in human plasma
Source: PubMed Central journal article supplement (PMC6347282; doi:10.1530/joe-18-0479), 2018-09-28

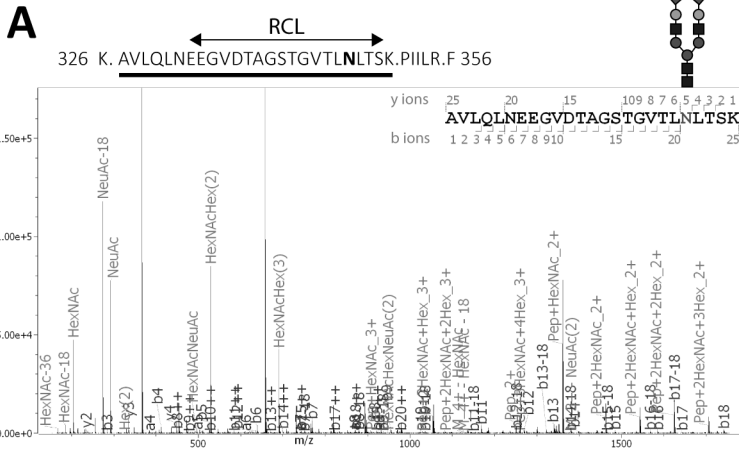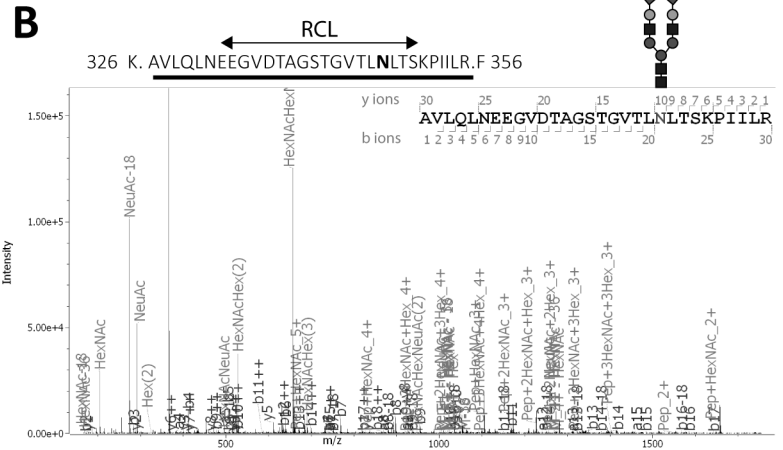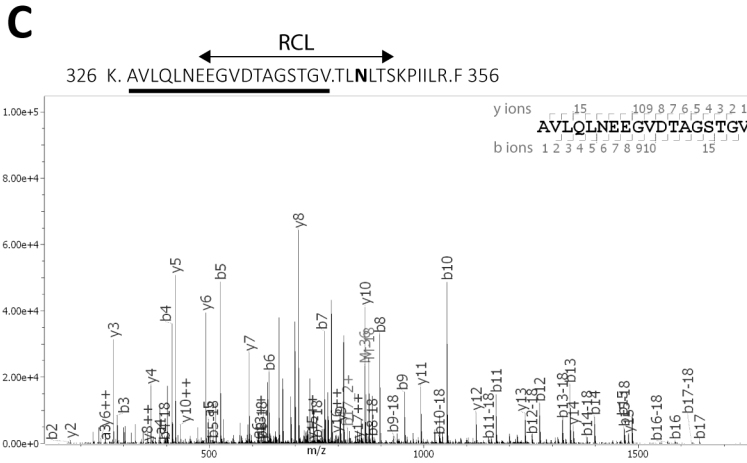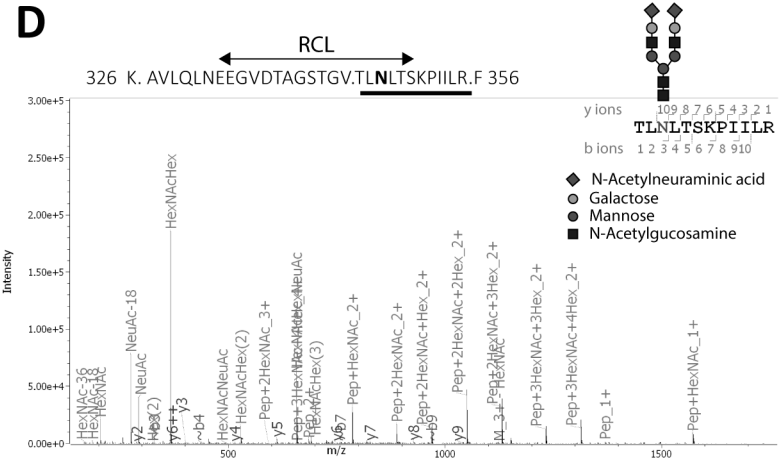

Supplement: JOE-18-0479-s001.pdf [file JOE-18-0479-s001.pdf]
