# Supplementary material for: Neutrophil elastase-cleaved corticosteroid-binding globulin is absent in human plasma
Source: PubMed Central journal article supplement (PMC6347282; doi:10.1530/joe-18-0479), 2018-09-28
Supplement: JOE-18-0479-t001.pdf [file JOE-18-0479-t001.pdf]

**Supplementary Table 1**

|                                                             | Skeletal muscle and adipose                               |                                                           | Liver        |                                 | Brain         |
|-------------------------------------------------------------|-----------------------------------------------------------|-----------------------------------------------------------|--------------|---------------------------------|---------------|
|                                                             | Lean group                                                | Obese group                                               | Lean group   | Obese and type 2 diabetes group |               |
| Number                                                      | 8 males                                                   | 10 males                                                  | 7 males      | 10 males                        | 8 males       |
| Age (years)                                                 | 50.5 ± 3.3                                                | 50.0 ± 3.3                                                | 47.5 ± 6.0   | 52.3 ± 2.9                      | 38.1 ± 5.8    |
| Body mass index (kg/m <sup>2</sup> )                        | 23.7 ± 0.4                                                | 32.9 ± 0.9                                                | 23.5 ± 1.1   | 35.0 ± 1.0                      | 24.9 ± 1.3    |
| Arterialized cortisol-binding activity (nM)                 | 281.5 ± 24.6                                              | 304.4 ± 50.6                                              | 398.4 ± 72.9 | 379.8 ± 94.4                    | 296.5 ± 23.0  |
| Arterialized 12G2 ELISA (nM)                                | 277.0 ± 18.2                                              | 296.9 ± 44.2                                              | 400.8 ± 54.9 | 388.9 ± 81.9                    | 282.0 ± 23.0  |
| Arterialized 9G12 ELISA (nM)                                | 250.0 ± 70.8                                              | 226.4 ± 67.1                                              | 338.8 ± 52.2 | 334.5 ± 29.1                    | 262.1 ± 55.9  |
| Arterial Blood Flow (L/min)                                 | Muscle:<br>0.0027 ± 0.0013<br>Adipose:<br>0.0017 ± 0.0004 | Muscle:<br>0.0034 ± 0.0013<br>Adipose:<br>0.0016 ± 0.0015 | 0.96 ± 0.17  | 1.22 ± 0.67                     | 0.48 ± 0.23   |
| Net uptake/release of cortisol binding capacity (nmol/min)* | Muscle:<br>-0.014 ± 0.165<br>Adipose:<br>-0.003 ± 0.077   | Muscle:<br>-0.148 ± 0.174<br>Adipose:<br>0.037 ± 0.117    | 15.6 ± 49.8  | -46.8 ± 52.8 <sup>‡</sup>       | 5.77 ± 10.36  |
| Net uptake/release of 12G2 ELISA (nmol/min)*                | Muscle:<br>-0.015 ± 0.186<br>Adipose:<br>0.002 ± 0.084    | Muscle:<br>-0.083 ± 0.146<br>Adipose:<br>0.077 ± 0.159    | 44.0 ± 70.2  | -56.6 ± 100.1                   | -7.60 ± 13.97 |
| Net uptake/release of 9G12 ELISA (nmol/min)*                | Muscle:<br>-0.0003 ± 0.146<br>Adipose:<br>-0.037 ± 0.110  | Muscle:<br>-0.079 ± 0.114<br>Adipose:<br>-0.001 ± 0.040   | 10.3 ± 50.3  | -29.7 ± 47.6                    | 7.02 ± 18.16  |

Data are mean ± SD

<sup>‡</sup>p<0.005 by Wilcoxon signed rank test versus zero and p<0.001 by Mann Whitney U test versus the healthy group

\* Net uptake/release = [arterial CBG – venous CBG (nmol/L)] x blood flow (L/min)
