# Supplementary material for: Neutrophil elastase-cleaved corticosteroid-binding globulin is absent in human plasma
Source: PubMed Central journal article supplement (PMC6347282; doi:10.1530/joe-18-0479), 2018-09-28
Supplement: JOE-18-0479-t002.pdf [file JOE-18-0479-t002.pdf]

**Supplementary Table 2**

| Category            | n  | Age             |       | Sex (n) |        |
|---------------------|----|-----------------|-------|---------|--------|
|                     |    | Mean(sd)        | Range | Male    | Female |
| Cardiovascular      | 21 | 65.1<br>(17.7)  | 32-94 | 10      | 11     |
| Gastroenterological | 7  | 70.25<br>(16.3) | 45-85 | 1       | 6      |
| Neurological        | 8  | 52.1<br>(23.8)  | 19-79 | 7       | 1      |
| Respiratory         | 56 | 66.3<br>(15.7)  | 30-92 | 34      | 22     |
| Sepsis              | 26 | 65.8<br>(17.5)  | 24-90 | 20      | 6      |
| Surgical abdominal  | 10 | 71.7<br>(6.7)   | 60-82 | 5       | 5      |
| Trauma              | 14 | 34.2<br>(21.1)  | 17-85 | 13      | 1      |
| Other*              | 4  | 62.25<br>(9.0)  | 49-68 | 1       | 3      |

\* Includes: foreign object/trauma/ENT, cardiothoracic surgical, malignancy
